# Supplementary material
Source: Springer Nature journal article supplement (https://www.springermedizin.de/resource/supplementary/12894_2013_316_MOESM6_ESM.pdf/9513452)

**HOXC6**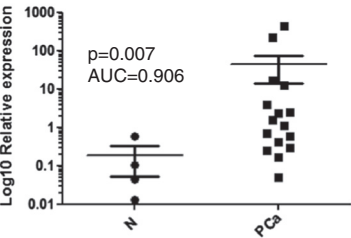**HOXC4**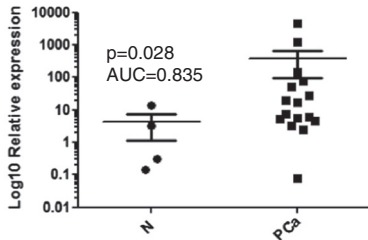**All HOX genes**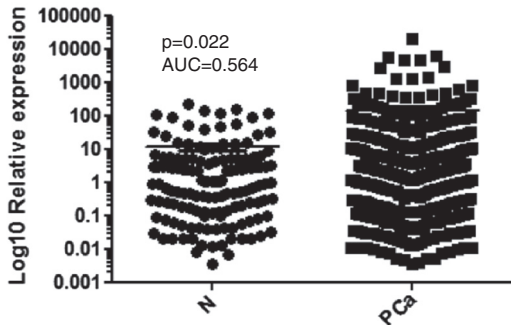

Supplement: MOESM6 [file 9513452]
